# Supplementary material
Source: Oxford University Press journal article supplement (doi:10.1093/g3journal_jkac184)

**A**

- ① **Generate transgene with landing site**  
**Inject into *unc-119***

*Extrachromosomal array*

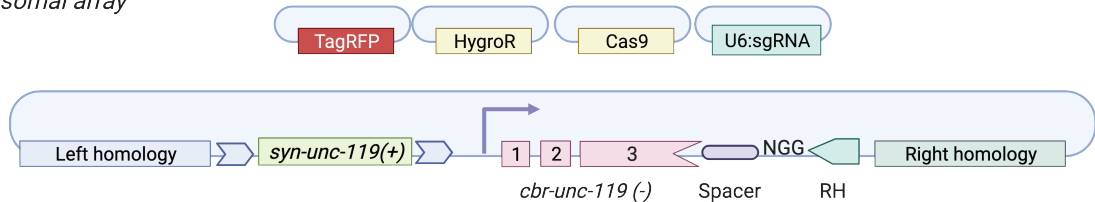

*Genome*

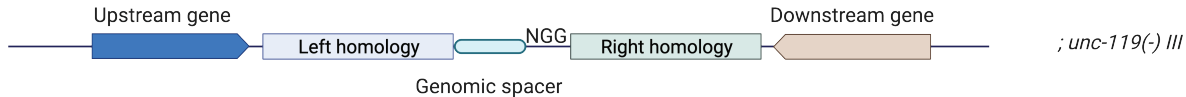

- ② **Identify transgene insertion**  
**Rescue but no red co-injection marker**

*Genome*

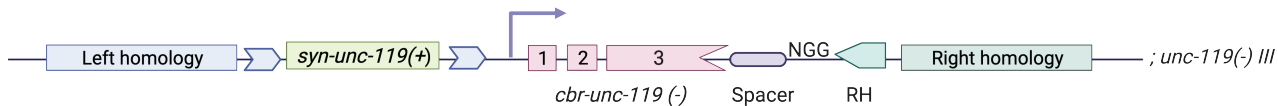

- ③ **Remove *syn-unc-119(+)* selection**  
**Inject Cre plasmid**

*Cre recombinase*

*Genome*

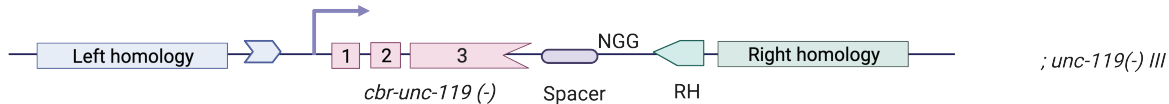

Supplement: jkac184_figure_s1.pdf [file jkac184_figure_s1.pdf]
