# Supplementary material
Source: Oxford University Press journal article supplement (doi:10.1093/g3journal_jkac184)

**A****1 Identify new insertion site**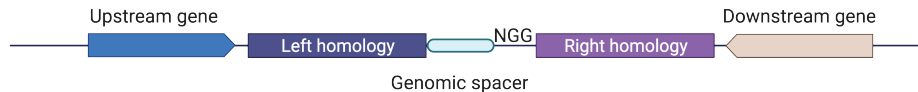**2 Gene synthesis**

sgRNAs

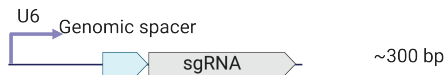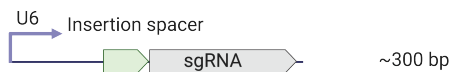Conversion fragment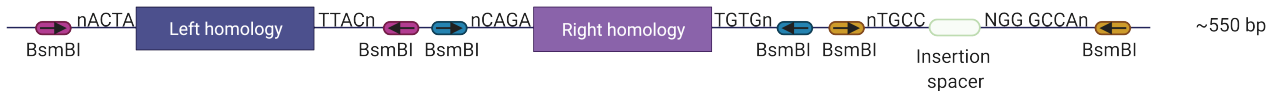**3 Single-pot Golden Gate reaction**Conversion fragment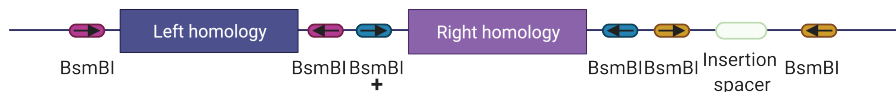ttTi5605 landing site vector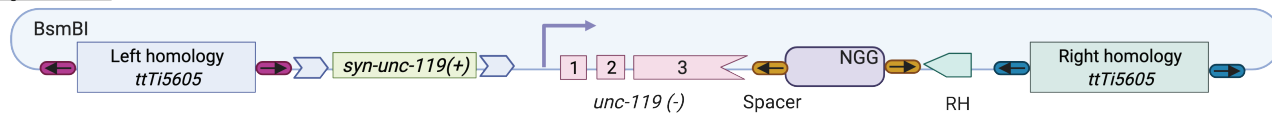Converted targeting site vector

BsmBI enzyme  
T4 ligase

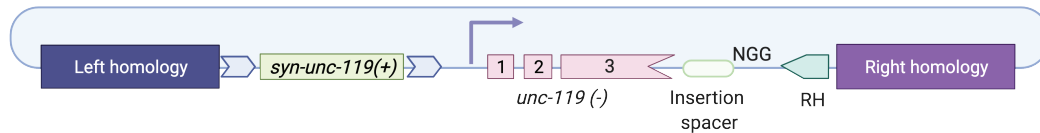

Supplement: jkac184_figure_s2.pdf [file jkac184_figure_s2.pdf]
