# Supplementary material
Source: Oxford University Press journal article supplement (doi:10.1093/g3journal_jkac184)
Supplement: jkac184_figure_s3.pdf [file jkac184_figure_s3.pdf]

# MosTI (Modular single-copy and Transgene Insertion)

## 1 Single-copy insertion

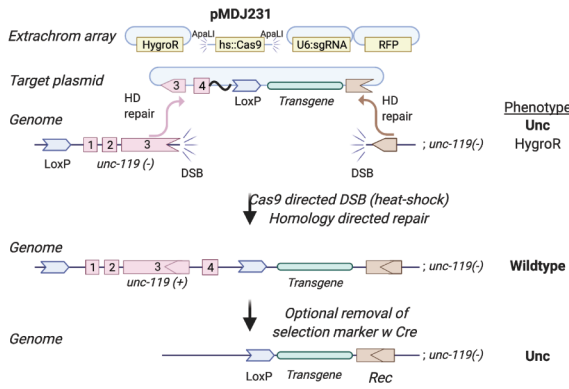

## 2 Array integration

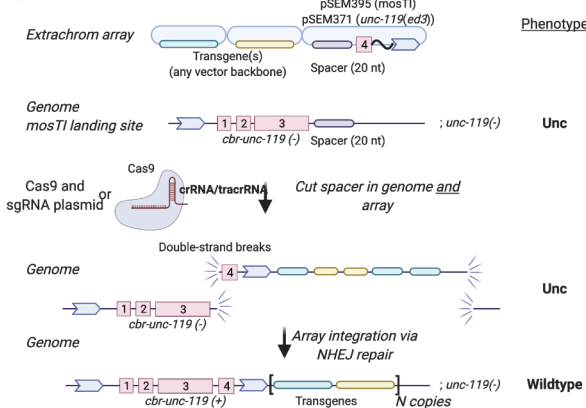

## 3 Insertion sites

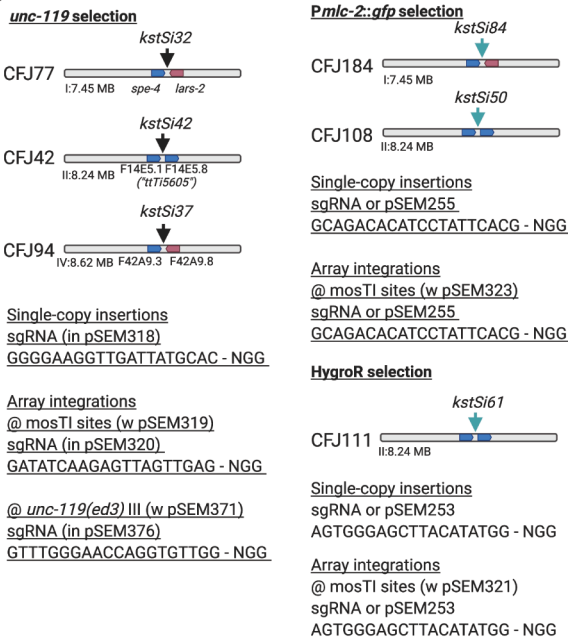

## 4 Target cloning vectors

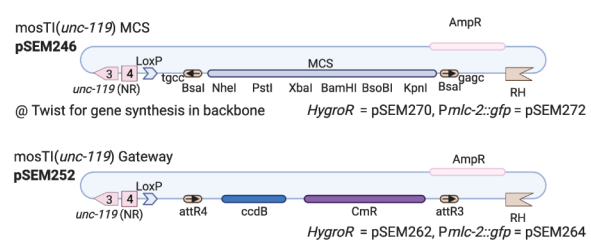

## 5 Transcriptional and translation fusions

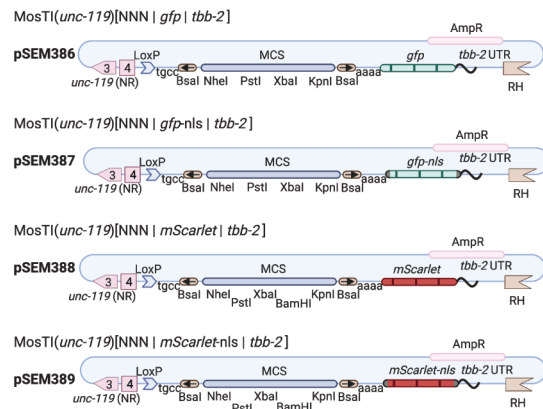

## 6 Operon co-expression

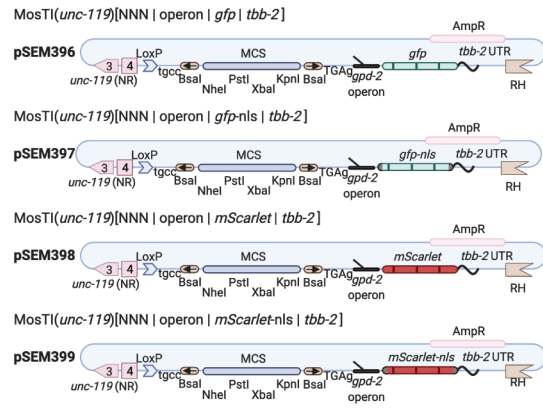

## 7 Tissue-specific expression

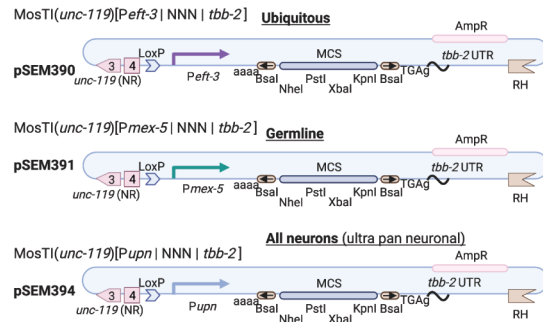

Strains available from CGC and plasmid deposited with Addgene  
Updates and protocols at [www.wormbuilder.org](http://www.wormbuilder.org)
