# Supplementary material
Source: Oxford University Press journal article supplement (doi:10.1093/g3journal_jkac184)

**A**

GFP expression

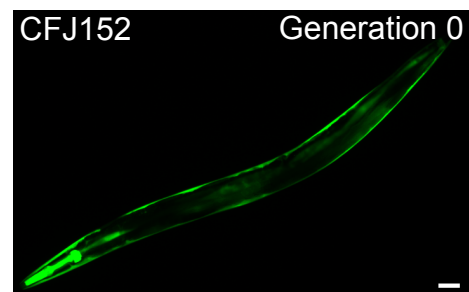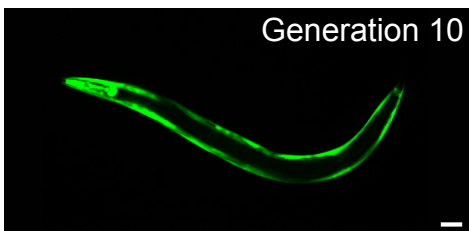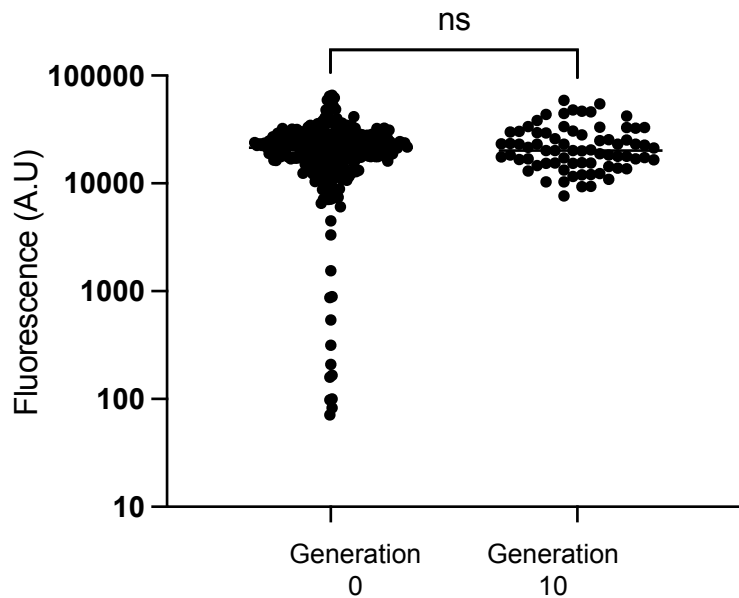**B**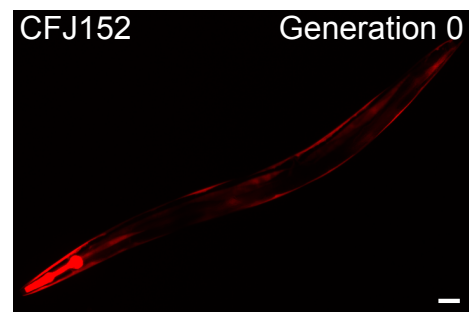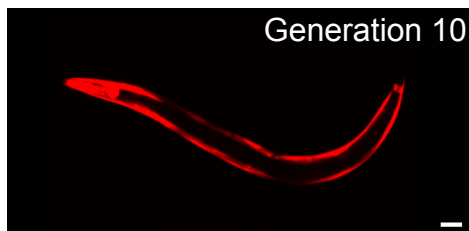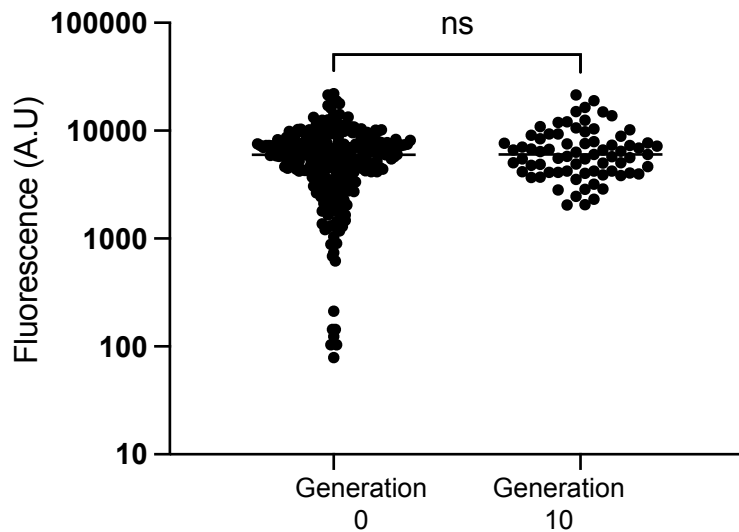

Supplement: jkac184_figure_s6.pdf [file jkac184_figure_s6.pdf]
