# Supplementary material
Source: Oxford University Press journal article supplement (doi:10.1093/g3journal_jkac184)

**A**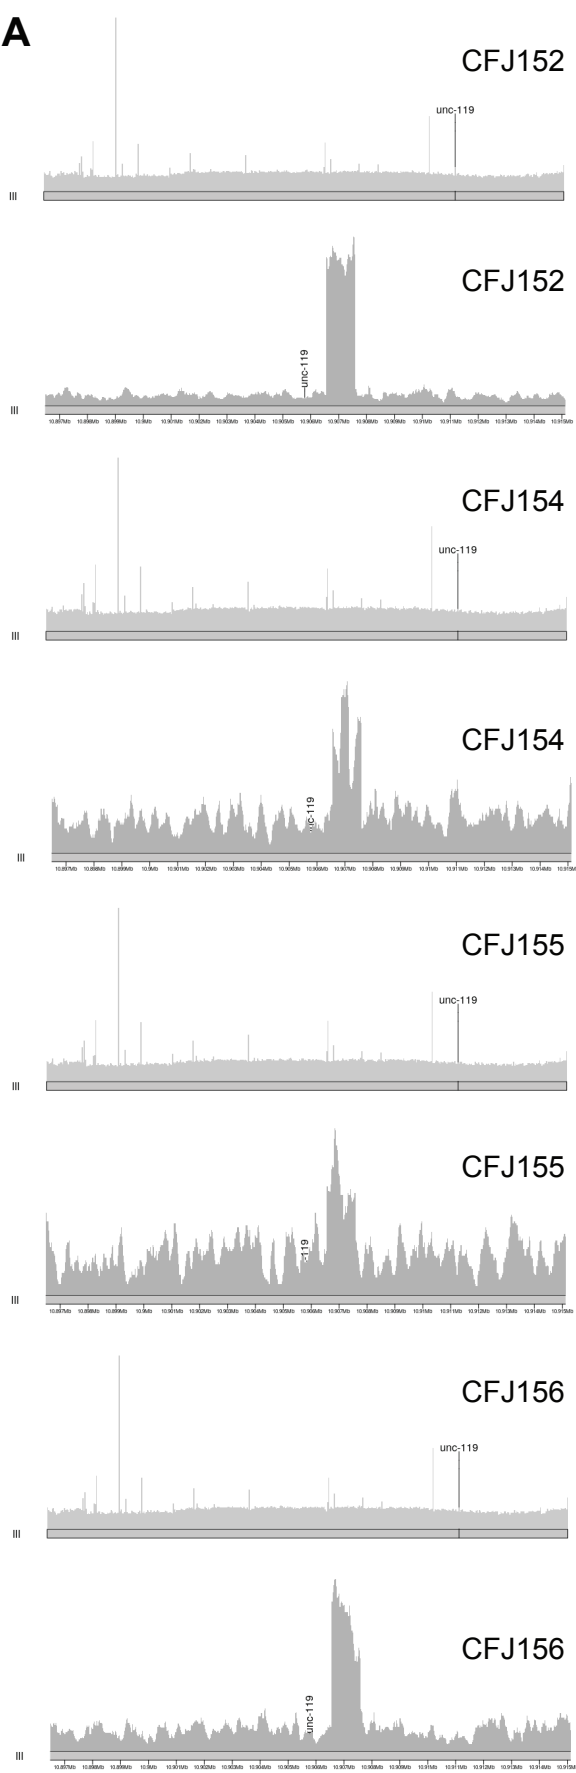**B**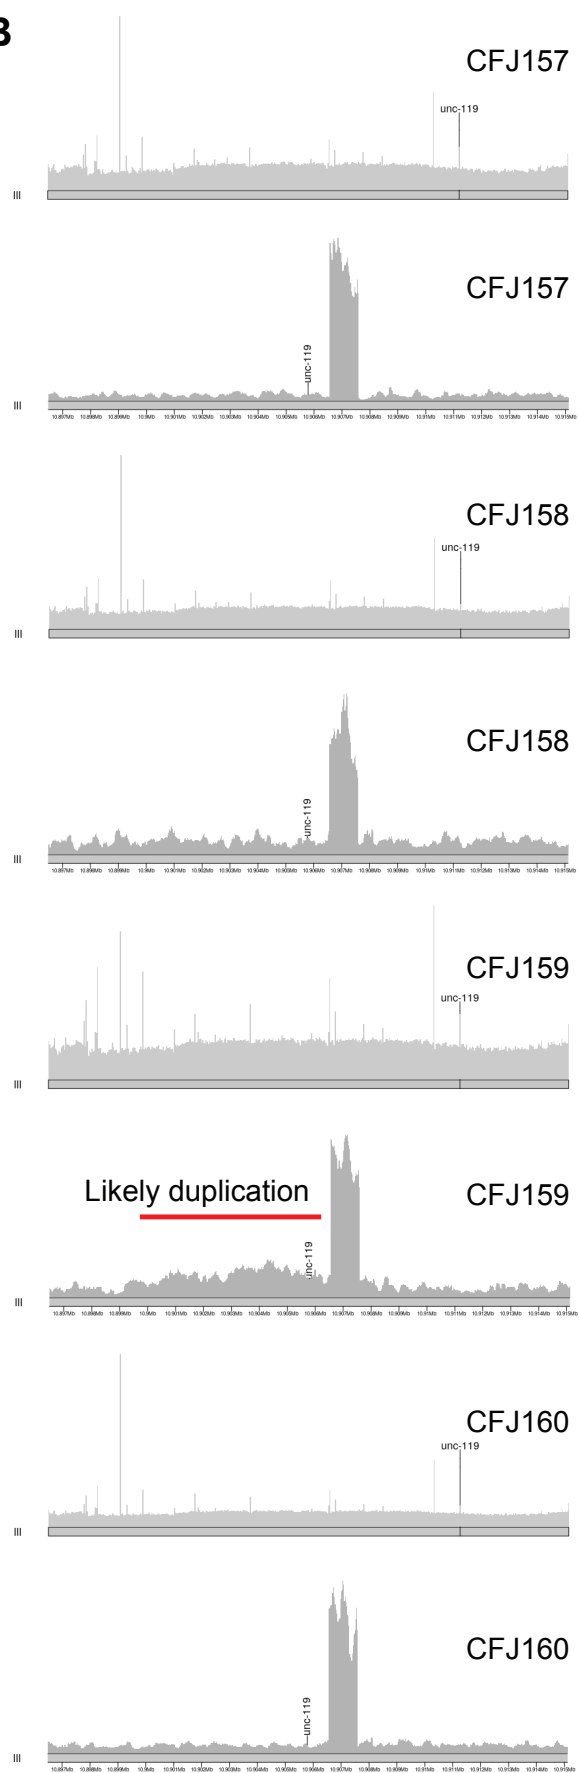

Supplement: jkac184_figure_s7.pdf [file jkac184_figure_s7.pdf]
